# Supplementary material
Source: PubMed Central journal article supplement (PMC4293770)
Supplement: DS_10.1177_0022034514551770.pdf [file DS_10.1177_0022034514551770.pdf]

T.P. Prates<sup>1</sup>, T.M. Taira<sup>2</sup>, M.C. Holanda<sup>2</sup>,  
L.A. Bignardi<sup>1</sup>, S.L. Salvador<sup>3</sup>, D.S. Zamboni<sup>4</sup>,  
F.Q. Cunha<sup>5</sup>, and S.Y. Fukada<sup>2\*</sup>

<sup>1</sup>Department of Pediatric Dentistry, School of Dentistry of Ribeirão Preto, University of São Paulo, São Paulo, Brazil; <sup>2</sup>Department of Physics and Chemistry, School of Pharmaceutical Sciences of Ribeirão Preto, University of São Paulo; <sup>3</sup>Department of Clinical Analyses, School of Pharmaceutical Sciences of Ribeirão Preto, University of São Paulo; <sup>4</sup>Department of Cell Biology, Ribeirão Preto Medical School, University of São Paulo; and <sup>5</sup>Department of Pharmacology, Ribeirão Preto Medical School, University of São Paulo; \*corresponding author, sfukada@usp.br

*J Dent Res* DOI: 10.1177/0022034514551770

## APPENDIX

### Infection with *Porphyromonas gingivalis*

The *Porphyromonas gingivalis* W83 was grown in prerduced brain heart infusion (Difco, Sparks, MD, USA), supplemented with 5% sheep blood (Cecon), 1 mg·mL<sup>-1</sup> hemin, and 0.5 mg·mL<sup>-1</sup> menadione (Sigma-Aldrich, St Louis, MO, USA), and incubated in an anaerobic glove box (85% N<sub>2</sub>, 5% CO<sub>2</sub>, 10% H<sub>2</sub>) at 37°C for 2 d. Before oral infection, all animals received antibiotic treatment—Bactrim suspension (concentration of sulfamethoxazole/trimethoprim oral suspension is 400/80 mg/5 mL), 15 mL / 300 mL of drinking water—for 4 d to reduce the indigenous oral flora, followed by 3 d of an antibiotic-free period.

In the 4th week after the last inoculation, sterile swab was placed in the oral cavity of mice and swirled for 15 sec before being placed in 1 mL of phosphate buffered saline. Bacterial infection was confirmed by culture of the sample on blood agar plates under anaerobic conditions, and CFU/mL was counted.

### Immunofluorescence

Osteoclast precursor cells were plated in glass slides inside 24-well plate (2 × 10<sup>5</sup> cells/well) and cultured in presence of M-CSF and RANKL for 24 hr. After this time, preosteoclasts

# NOD2 Contributes to *Porphyromonas gingivalis*-induced Bone Resorption

were incubated with *P. gingivalis* (multiplicity of infection at 1) stained with CFSE (5 μM) for 30 min. Preosteoclasts were incubated with *P. gingivalis* for 1 hr. Noninternalized bacteria was removed, and cells were fixed with paraformaldehyde (1%) and subsequently stained with phalloidin-rhodamine (Invitrogen). Slides were analyzed by confocal microscopy.

### Flow Cytometry Analysis

*P. gingivalis* were stained with Fluorescein Isothiocyanate isomer 1 (Sigma F 7250; 0.1 mg/mL in 0.1M sodium bicarbonate buffer) for 1 hr. Preosteoclasts were incubated with *P. gingivalis* (multiplicity of infection at 3) for 30 min. Noninternalized bacteria was removed, and cells were analyzed by FACSCalibur using CellQuest software (BD Biosciences).

### Primers

Primers and probes (Applied Biosystems) included RANKL (Mm00441906), OPG (Mm01205928), cathepsin K (CTSK) (Mm00484039), and MMP-9 (Mm00442991). The gene beta-actin (Mn00607939) or GAPDH (Mm99999915) was used as the endogenous gene. The relative levels of gene expression were determined by the 2<sup>-ΔΔ Cycle Threshold</sup> (2<sup>-ΔΔCT</sup>) method, in which data are shown as fold increase over the control group (noninfected).
